# Supplementary material for: Early production of IL‐17A by γδ T cells in the trachea promotes viral clearance during influenza infection in mice
Source: PubMed Central journal article supplement (PMC7003741; doi:10.1002/eji.201948157), 2019-12-04
Supplement: EJI-50-97-s001.pdf [file EJI-50-97-s001.pdf]

# European Journal of Immunology

Supporting Information  
for

DOI 10.1002/eji.201948157

Miguel Palomino-Segura, Irene Latino, Yagmur Farsakoglu  
and Santiago F. Gonzalez

**Early production of IL-17A by  $\gamma\delta$  T cells in the trachea promotes viral clearance  
during influenza infection  
in mice**

**Early production of IL-17A by V $\gamma$ 4+  $\gamma\delta$  T cells in the trachea promotes neutrophil recruitment and viral clearance during influenza infection.**

Miguel Palomino-Segura<sup>1,2</sup>, Irene Latino<sup>1</sup>, Yagmur Farsakoglu<sup>1,3</sup> and Santiago F. Gonzalez<sup>1\*</sup>

**Supplementary information**

Supplementary Figure 1

Supplementary Movie 1

Supplementary Table 1

**A**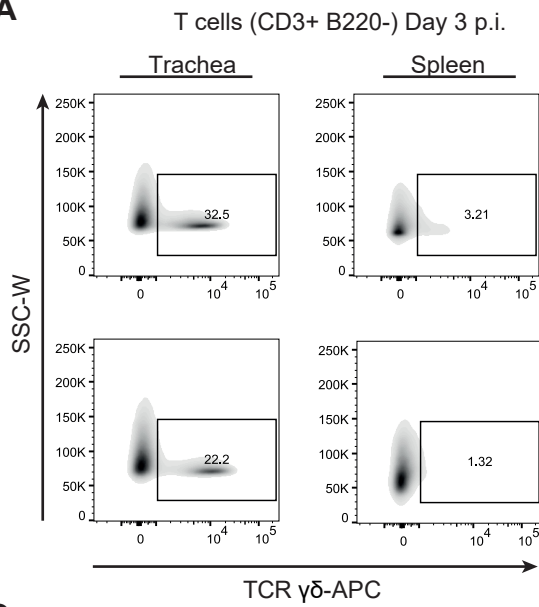**B**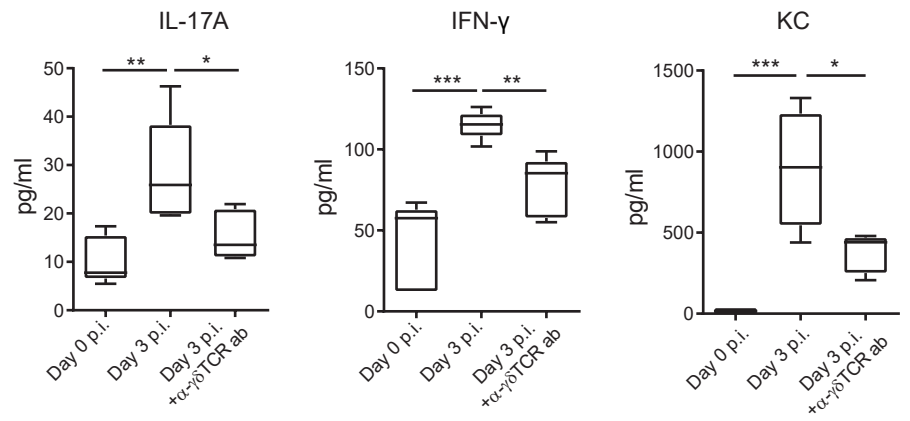**C**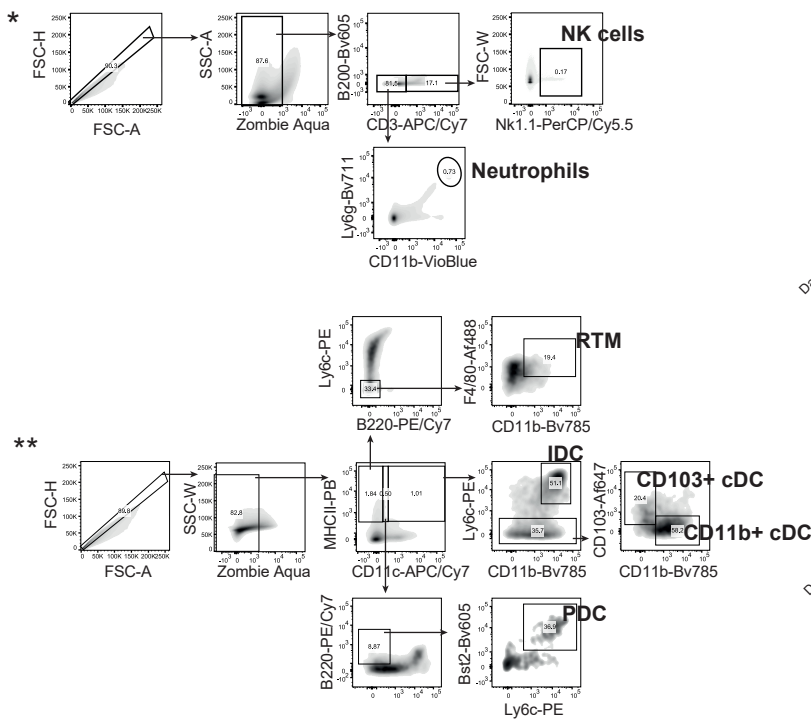**D**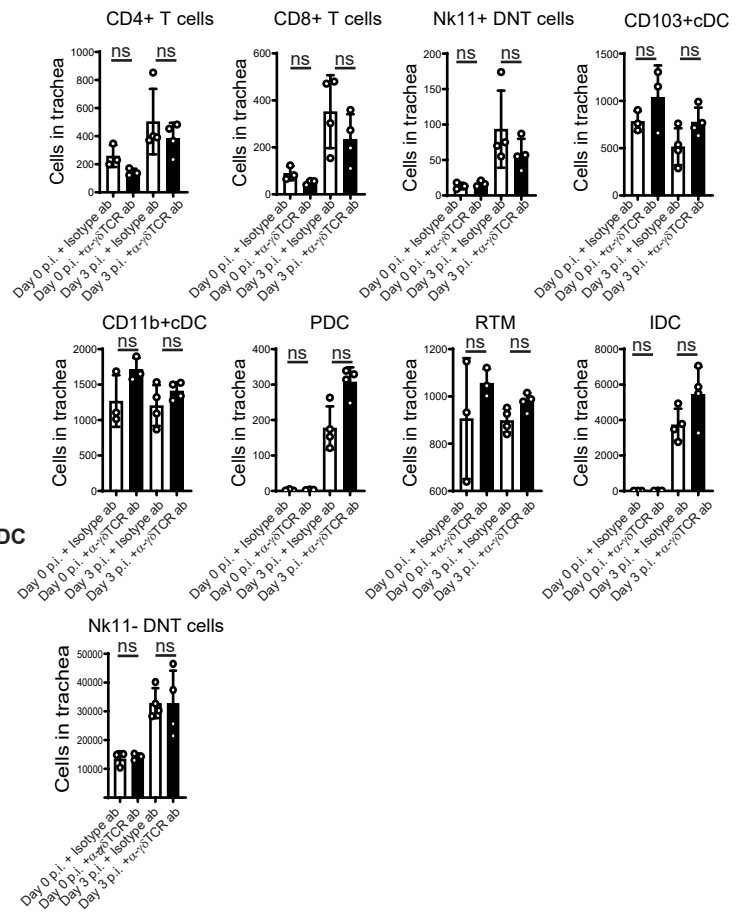**E**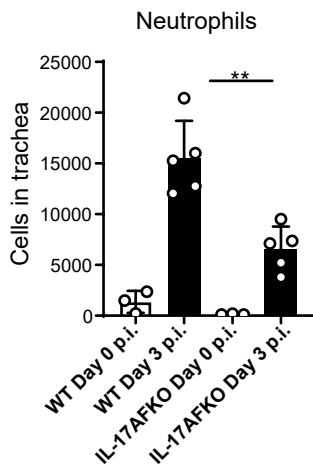**F**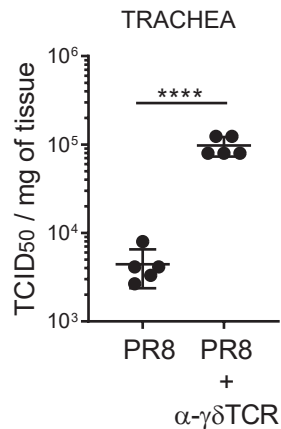

**Supplementary Figure 1.** (A) Representative scatterplots showing the reduction of  $\gamma\delta$  T cell in trachea and spleen from mice treated with anti- $\gamma\delta$  TCR antibody ( $\alpha$ - $\gamma\delta$  TCR) at day 3 p.i.. (B) Levels of secreted IL-17A, IFN- $\gamma$  and KC in trachea from mice treated with anti- $\gamma\delta$  TCR antibody ( $\alpha$ - $\gamma\delta$  TCR ab) and with isotype control antibody (day 3 p.i.) at day 3 p.i. ( $n = 4$ -5 mice/group). (C) (Upper panels (\*)) flow cytometric characterisation of neutrophils and NK cells, and (lower panels (\*\*)) inflammatory dendritic cells (IDC), plasmacytoid DC (PDC), CD103+ conventional DC (CD103+ cDC), CD11b+ conventional DC (CD11b+ cDC) and resident respiratory tract macrophages (RTM) in mouse trachea according to [6]. (D) Flow cytometric quantification of total numbers of T cell subsets, DC subsets and macrophages in trachea from mice treated with anti- $\gamma\delta$  TCR antibody ( $\alpha$ - $\gamma\delta$  TCR ab) and with isotype control antibody ( $\alpha$ -Isotype ab) at day 0 and 3 p.i. ( $n = 3$ -4 mice/group). (E) Flow cytometric quantification of  $\gamma\delta$  T cell in IL-17AFKO mice at day 3 p.i. ( $n = 3$ -5 mice/group). (F) Virus titres in trachea determined by TCID<sub>50</sub> from mice infected with influenza virus and treated with an anti- $\gamma\delta$  TCR antibody (PR8+  $\alpha$ - $\gamma\delta$  TCR) or with the isotype control antibody at day 3 p.i. ( $n = 5$  mice/group). The presented data are representative of at least two (A, D, E and F) or three (B) independent experiments. Results are given as mean  $\pm$  SD. In B box plots show 25<sup>th</sup> to 75<sup>th</sup> percentiles and whiskers show minimum and maximum values. Statistical significance was determined by Two-tailed Student's t-test (B, F) or Mann-Whitney U-test (D, E). (ns  $p > 0.05$ ; \* $p < 0.05$ ; \*\* $p < 0.01$ ; \*\*\* $p < 0.001$ ; \*\*\*\* $p < 0.0001$ ).

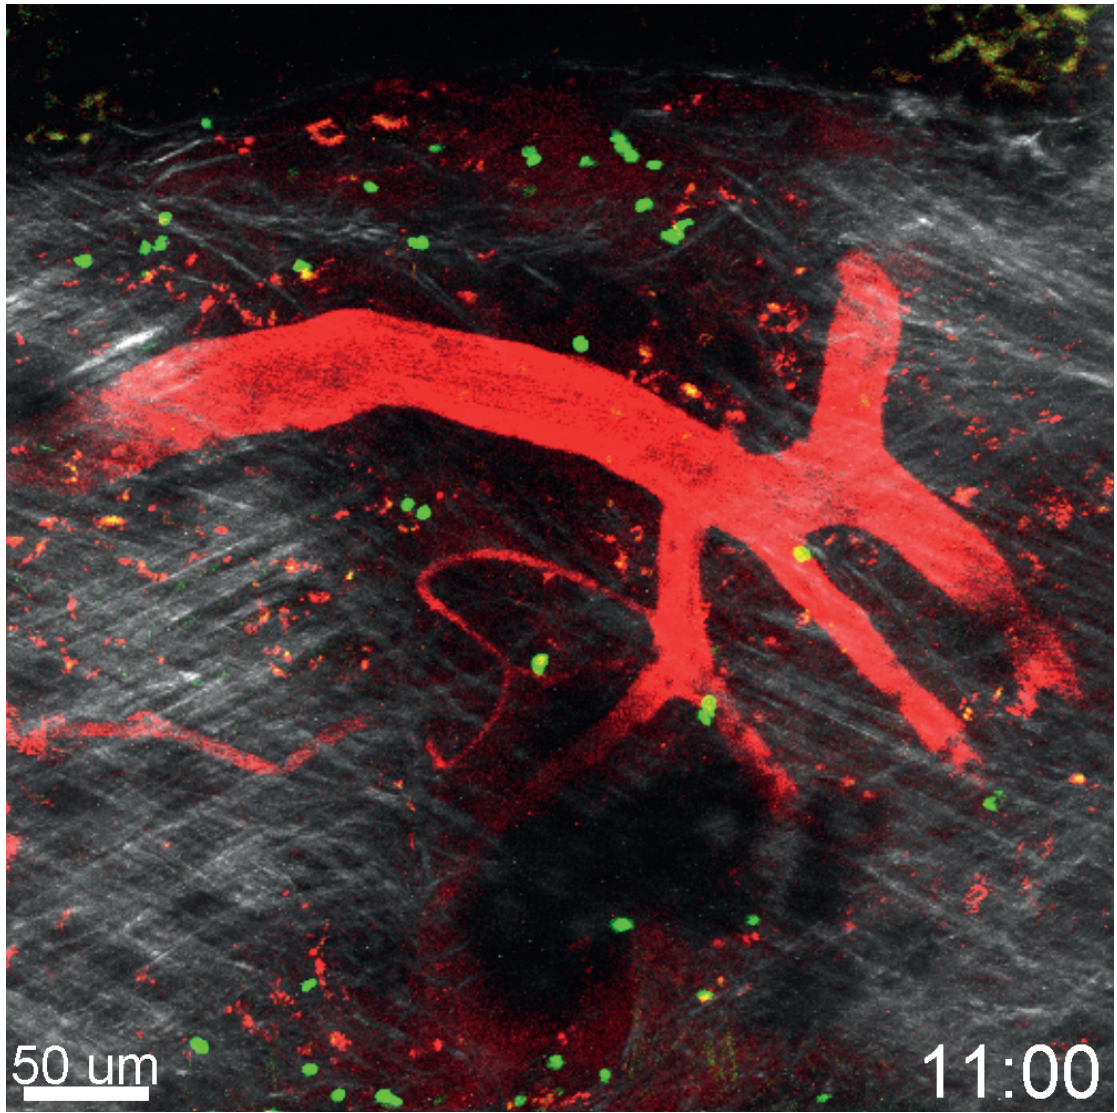

**Supplementary Movie 1. In vivo imaging of  $\gamma\delta$  T cell recruitment to the trachea after influenza infection.** (First part) Two videos (a,b) of 30-45 min time-lapse 3D image showing the dynamics of  $\gamma\delta$  T cells (green, small and motile), SHG signal from fibrillary collagen (grey) and blood vessels (red) in trachea at day 3 p.i. (Second part) magnified representative sequences showing  $\gamma\delta$  T cell extravasation from the blood vessels into the tracheal tissue. Scale bar represents 50  $\mu\text{m}$ .

**Supplementary Table 1.**

| Antibody target          | Clone             | Color              | Manufacturer                                  |
|--------------------------|-------------------|--------------------|-----------------------------------------------|
| B220                     | RA3-6B2           | PE/Cy7, BV605      | Biolegend                                     |
| CD11b                    | M1/70             | AF488, BV785,      | Biolegend                                     |
| CD45                     | 30-F11            | AF700              | Biolegend                                     |
| CD3 $\epsilon$           | eBio500A2         | eFluor450          | eBioscience                                   |
| NK1.1                    | PK136             | AF488, PerCP-Cy5.5 | Biolegend, eBioscience                        |
| CXCR3                    | CXCR3-173         | AF488              | Biolegend                                     |
| CD69                     | H1.2F3            | FITC, PE           | Biolegend                                     |
| IFN- $\gamma$            | XMG1.2            | BV785              | Biolegend                                     |
| IL17-A                   | TC11-18H10.1      | PE                 | Biolegend                                     |
| Ly-6G                    | 1A8               | BV711              | Biolegend                                     |
| CD16/32                  | 93                | Pure               | Biolegend                                     |
| CD8 $\alpha$             | 53-6.7            | PE/Cy7, BV650      | Biolegend                                     |
| CD4                      | GK1.5             | APC/Cy7            | Biolegend                                     |
| $\gamma\delta$ TCR       | GL3               | APC                | Biolegend                                     |
| CD27                     | LG.7F9            | PE/Cy7             | eBioscience                                   |
| CCR6                     | 29-2L17           | PE/Dazzle 594      | Biolegend                                     |
| $\alpha$ Ly-6C           | HK1.4             | PE                 | Biolegend                                     |
| $\alpha$ F4/80           | BM8               | AF488              | Biolegend                                     |
| $\alpha$ CD103           | 2E7               | AF647              | Biolegend                                     |
| $\alpha$ CD11b           | M1/70             | BV785, VioBlue     | Biolegend, Miltenyi                           |
| $\alpha$ I-A/I-E (MHCII) | M5/114.15.2       | Pacific Blue       | Biolegend                                     |
| $\alpha$ CD11c           | N418              | APC/Cy7            | Biolegend                                     |
| Bst2                     | 927               | Bv605              | Biolegend                                     |
| TCR V $\gamma$ 4 (2)     | UC3-10A6          | FITC, Pure         | Biolegend, BioXcell                           |
| TCR V $\gamma$ 1.1/Cr4   | 2.11              | PerCP/Cy5.5        | Biolegend                                     |
| TCR V $\gamma$ 6         | 17D1              | DyLight 800*       | donated by Dr. Immo Prinz<br>(U. of Hannover) |
| TCR $\gamma\delta$       | UC7-13D5          | Pure               | Bioxcell                                      |
| Armenian hamster IgG     | (isotype control) | Pure               | Bioxcell                                      |

\*In-house labelled with Lightning-Link<sup>®</sup> Rapid DyLight<sup>®</sup> 800 conjugation kit (Innova Biosciences).
